# Supplementary material
Source: PubMed Central journal article supplement (PMC2947841)
Supplement: NIHMS232857-supplement-supplement_1.pdf [file NIHMS232857-supplement-supplement_1.pdf]

## SUPPLEMENTARY MATERIAL

### Supplemental Materials and Methods

#### Gateway<sup>®</sup> IDTS library construction

The Invitrogen Gateway<sup>®</sup> system was used to clone of 159 *L. pneumophila* gene products. Genes were amplified using a forward primer designed to anneal to 25 bases of gene-specific sequence at the 5' end of each gene and 25 bases of *attB* specific base pairs for N-terminal fusions (GGGGACAAGTTTGTACAAAAAAGCAGGCTTC) and a reverse primer had 25 bases of gene-specific sequence at the 3' end of each gene followed by 25 bases of *attB* specific base pairs containing a stop codon (GGGGACCACTTTGTACAAGAAAGCTGG GTCCTA). PCR products of the correct size were purified according to manufacturer's instructions (Invitrogen) and recombined with pDONR221 (Invitrogen) using BP Clonase Enzyme Mix. The

plasmids derived in this fashion were sequenced, and the appropriate recombinants were subjected to a second recombination reaction using LR clonase II enzyme mix (Invitrogen) to introduce the *L. pneumophila* gene into pDEST53 (Invitrogen; mammalian CMV-GFP fusion vector). Correct plasmids constructs were verified by restriction digest and purified using Ultra Pure Miniprep kits (Qiagen) for use in transfections.

### **Nod1 psiRNA knock-down experiments**

PAGE purified oligos (IDT, Coralville, IA) were annealed, 5'-phosphorylated, and ligated into pRNAT-U6.1/Neo according to manufactures instruction (GenScript; Table S2). Plasmids were prepared using Qiagen endofree maxiprep and 100 ng of each was transfected into  $\sim 2 \times 10^4$  HEK293T in 96-well plates. 24 hours after transfection, the cell culture medium was changed and cells were transfected with 200 ng pNF $\kappa$ B-luciferase. After 16 hours, cells were infected as previously described for the NF- $\kappa$ B reporter assay with *L. pneumophila* infection. To confirm knockdown of Nod1 in HEK293T cells, cells were co-transfected with 10 ng myc-Nod1 and 200 ng of siRNA plasmids for 48 hrs. Cells were collected and then analyzed by Western blotting with anti-myc antibody (Clontech) for expression of myc-Nod1. For construction of myc-Nod1, Nod1 was amplified from cDNA isolated from U937 cells using primers Nod1F-myc and Nod1R and then inserted into plasmid myc using the *EcoRI* and *XhoI* sites. Proper construction of the plasmid was confirmed by sequencing.

## Supplementary Figures

**Figure S1. TLR-independent induction of p65 translocation dependent on the presence of the Icm/Dot translocation system.** Bone marrow macrophages from C57BL/6 (black bars) and C57BL/6 *trif*<sup>-/-</sup> *myd88*<sup>-/-</sup> double knockout (DKO) mice (white bars) were incubated with the Dot<sup>+</sup>-*flaA*<sup>-</sup>, or *dotA*<sup>-</sup> *flaA*<sup>-</sup> strains at MOI=1 for noted times. The percentage of infected cells with NF-κB p65 staining in the nucleus was quantitated by immunofluorescence microscopy (Losick *et al.*, 2006).

## Figure S2. *L. pneumophila* Gateway<sup>®</sup> IDTS library

(A) Gateway<sup>®</sup> cloning scheme. *L. pneumophila* genes were PCR amplified with *attB* sites. Products were introduced into the entry vector (pDONR221) by site-specific recombination and then introduced by a second site-specific recombination reaction into an expression plasmid that allows generation of GFP fusions in pDEST53 (Experimental Procedures). (B) HEK293T cells were transfected with the resulting GFP fusion plasmids for 24 h. Cell lysates were assayed for GFP-protein expression by Western blot with anti-GFP antibodies. The expected molecular weight of the GFP fusions is marked by a white dot.

## Figure S3. Nod1 silencing in HEK293T cells reduces NF-κB activation in response to *L. pneumophila*

(A) HEK293T cells harboring the pNFκB-luciferase reporter plasmid were transfected with the indicated siRNA plasmids and then challenged with wild-type *L. pneumophila* Lp02 at MOI = 1 and assayed for luminescence at 8 hours post infection. Fold NF-κB activity is the ratio of the relative light units of cells challenged with *L. pneumophila* compared to cells incubated in absence of bacteria. Data represent the mean ± SE of triplicate samples from a representative experiment, performed in triplicate. \* *T*-test *p*-value ≤ 0.05. (B) To verify Nod1 knockdown, HEK293T cells were co-transfected with 100 ng of the indicated siRNA plasmid and 10 ng

pmyc-Nod1. Samples were then assayed by Western blot for myc-Nod1 expression. Tubulin was used as a loading control.

**Table S1.** Complete list of all the *L. pneumophila* genes included in the Gateway<sup>®</sup> library.

**Table S2.** Primers used in this study.

**Table S3.** Plasmids used in this study.

**Table S4.** Strains used in this study.

**Table S1. Gateway® Library of *Legionella pneumophila* known and putative IDTS**

| <b>lpg#</b>    | <b>Gene</b>            | <b>Domain/ paralogs<sup>a</sup></b>                                       | <b>Evidence for Translocation<sup>b</sup></b> | <b>Expression by Blot (293T)<sup>c</sup></b> | <b>References</b>                                                   |
|----------------|------------------------|---------------------------------------------------------------------------|-----------------------------------------------|----------------------------------------------|---------------------------------------------------------------------|
| <b>lpg0035</b> | <i>ceg1</i>            | -                                                                         | ND                                            | -                                            |                                                                     |
| <b>lpg0038</b> | <i>legA10</i>          | AR                                                                        | BLA                                           | +                                            | de Felipe <i>et al.</i> , 2008                                      |
| <b>lpg0059</b> | <i>ceg2</i>            | -                                                                         | UA                                            | +                                            | Huang, unpublished                                                  |
| <b>lpg0080</b> | <i>ceg3</i>            | -                                                                         | CyaA                                          | +                                            | Burstein <i>et al.</i> , 2009                                       |
| <b>lpg0096</b> | <i>ceg04</i>           | lpg1101 paralog                                                           | UA, CyaA                                      | +                                            | Huang, unpublished;<br>Burstein <i>et al.</i> , 2009                |
| <b>lpg0103</b> | <i>vipF</i>            | N-acetyltransferase                                                       | CyaA                                          | +                                            | Shohdy <i>et al.</i> , 2005                                         |
| <b>lpg0126</b> | <i>cegC2</i>           | Lpg2433( <i>ceg30</i> ),<br>lpg 1120, lpg1484<br>( <i>ceg22</i> ) paralog | CyaA                                          | -                                            | Altman and Segal, 2008                                              |
| <b>lpg0135</b> | <i>sdhB</i>            | Lpg2829 (SidH)<br>paralog                                                 | ND                                            | +                                            |                                                                     |
| <b>lpg0171</b> | <i>legU1</i>           | F-box                                                                     | BLA                                           | +                                            | de Felipe <i>et al.</i> , 2008                                      |
| <b>lpg0208</b> | <i>ceg6/ pkn5</i>      | ser/thr kinase                                                            | ND                                            | -                                            |                                                                     |
| <b>lpg0209</b> | -                      | -                                                                         | ND                                            | +                                            |                                                                     |
| <b>lpg0234</b> | <i>sidE</i>            | -                                                                         | <i>Cre/loxP</i> , CyaA                        | +                                            | Cambronne and Roy,<br>2007; Luo and Isberg,<br>2004                 |
| <b>lpg0240</b> | <i>ceg8</i>            | -                                                                         | CyaA                                          | +                                            | Burstein <i>et al.</i> , 2009                                       |
| <b>lpg0275</b> | <i>sdbA</i>            | lipase                                                                    | UA                                            | +                                            | Huang, unpublished                                                  |
| <b>lpg0276</b> | <i>legG2</i>           | Ras GEF                                                                   | BLA, CyaA                                     | +                                            | de Felipe <i>et al.</i> , 2008; de<br>Felipe <i>et al.</i> , 2005   |
| <b>lpg0279</b> | -                      | -                                                                         | ND                                            | +                                            |                                                                     |
| <b>lpg0294</b> | -                      | -                                                                         | CyaA                                          | ND                                           | Kubori <i>et al.</i> , 2008;<br>Zusman <i>et al.</i> , 2007         |
| <b>lpg0390</b> | <i>vipA</i>            | CC                                                                        | CyaA                                          | +                                            | Shohdy <i>et al.</i> , 2005                                         |
| <b>lpg0401</b> | <i>ceg11</i>           | -                                                                         | UA                                            | +                                            | Huang, unpublished                                                  |
| <b>lpg0402</b> | <i>legA9/ceg1</i><br>2 | AR                                                                        | UA, CyaA                                      | +                                            | de Felipe <i>et al.</i> , 2008; Pan<br><i>et al.</i> , 2008         |
| <b>lpg0403</b> | <i>legA7</i>           | AR                                                                        | UA, CyaA                                      | -                                            | de Felipe <i>et al.</i> , 2008; Pan<br><i>et al.</i> , 2008         |
| <b>lpg0404</b> | <i>ceg13</i>           | -                                                                         | ND                                            | -                                            |                                                                     |
| <b>lpg0436</b> | <i>legA11</i>          | -                                                                         | BLA                                           | +                                            | de Felipe <i>et al.</i> , 2008; Pan<br><i>et al.</i> , 2008         |
| <b>lpg0437</b> | <i>ceg14</i>           | -                                                                         | CyaA                                          | -                                            | Burstein <i>et al.</i> , 2009                                       |
| <b>lpg0439</b> | <i>ceg15</i>           | Phospholipase?                                                            | UA                                            | -                                            | Huang, unpublished                                                  |
| <b>lpg0483</b> | <i>legA12</i>          | AR                                                                        | BLA                                           | +                                            | de Felipe <i>et al.</i> , 2008;<br>Habyarimana <i>et al.</i> , 2008 |

|                |              |                              |                |   |                                                                                            |
|----------------|--------------|------------------------------|----------------|---|--------------------------------------------------------------------------------------------|
| <b>lpg0515</b> | <i>legD2</i> | phytanoyl-CoA dioxygenase    | -              | + | de Felipe <i>et al.</i> , 2008                                                             |
| <b>lpg0519</b> | <i>ceg17</i> | -                            | CyaA           | - | {Burstein, 2009 #116                                                                       |
| <b>lpg0550</b> | -            | -                            | ND             | + |                                                                                            |
| <b>lpg0563</b> | -            | -                            | ND             | + |                                                                                            |
| <b>lpg0581</b> | -            | -                            | ND             | + |                                                                                            |
| <b>lpg0621</b> | <i>sida</i>  | CC                           | Cre/loxP, CyaA | + | Cambronne and Roy, 2007; Luo and Isberg, 2004                                              |
| <b>lpg0634</b> | -            | -                            | UA, CyaA       | - | Huang, unpublished; Kubori <i>et al.</i> , 2008                                            |
| <b>lpg0642</b> | <i>wipB</i>  | -                            | CyaA           | + | Ninio <i>et al.</i> , 2005                                                                 |
| <b>lpg0645</b> | -            | -                            | ND             | + |                                                                                            |
| <b>lpg0693</b> | <i>ligA</i>  | -                            | ND             | + |                                                                                            |
| <b>lpg0695</b> | <i>legA8</i> | AR                           | BLA, CyaA      | + | de Felipe <i>et al.</i> , 2008; Habyarimana <i>et al.</i> , 2008; Pan <i>et al.</i> , 2008 |
| <b>lpg0717</b> | -            | -                            | ND             | + |                                                                                            |
| <b>lpg0733</b> | -            | CC                           | UA             | + | Huang, unpublished                                                                         |
| <b>lpg0823</b> | -            | -                            | ND             | - |                                                                                            |
| <b>lpg0921</b> | -            | -                            | ND             | + |                                                                                            |
| <b>lpg0926</b> | -            | -                            | UA             | + | Huang, unpublished                                                                         |
| <b>lpg0940</b> | <i>lidA</i>  | CC                           | IF             | + | Derre and Isberg, 2005; Conover <i>et al.</i> , 2003                                       |
| <b>lpg0945</b> | <i>legL1</i> | LRR                          | BLA            | + | de Felipe <i>et al.</i> , 2008                                                             |
| <b>lpg0952</b> | -            | VipD paralog                 | ND             | + |                                                                                            |
| <b>lpg1098</b> | <i>vrrB</i>  | -                            | ND             | + |                                                                                            |
| <b>lpg1101</b> | <i>sdmA</i>  | lpg2464 (SidM) paralog       | CyaA           | + | Burstein <i>et al.</i> , 2009                                                              |
| <b>lpg1108</b> | -            | Esterase                     | UA             | + | Huang, unpublished                                                                         |
| <b>lpg1111</b> | -            | lpg0940 (LidA) paralog       | UA             | + | Huang, unpublished                                                                         |
| <b>lpg1120</b> | -            | lpg2433 paralog              | UA, CyaA       | - | Huang, unpublished; Burstein <i>et al.</i> , 2009                                          |
| <b>lpg1121</b> | <i>ceg19</i> | -                            | UA, CyaA       | + | Huang, unpublished; Burstein <i>et al.</i> , 2009; Heidtman <i>et al.</i> , 2008           |
| <b>lpg1137</b> | -            | -                            | ND             | + |                                                                                            |
| <b>lpg1144</b> | <i>cegC3</i> | CC                           | CyaA           | + | Altman and Segal, 2008                                                                     |
| <b>lpg1151</b> | -            | loose lpg0234 (SidE) paralog | ND             | + |                                                                                            |
| <b>lpg1158</b> | -            | -                            | UA, CyaA       | + | Huang, unpublished; Kubori <i>et al.</i> , 2008                                            |

|                |                   |                                    |                         |     |                                                                                                                                         |
|----------------|-------------------|------------------------------------|-------------------------|-----|-----------------------------------------------------------------------------------------------------------------------------------------|
| <b>lpg1171</b> | <i>ceg21</i>      | -                                  | ND                      | +   |                                                                                                                                         |
| <b>lpg1227</b> | <i>vpdB</i>       | Phospholipase                      | IF                      | +   | VanRheenen <i>et al.</i> , 2006                                                                                                         |
| <b>lpg1290</b> | -                 | CC                                 | CyaA,UA                 | -   | Huang, unpublished;<br>Burstein <i>et al.</i> , 2009                                                                                    |
| <b>lpg1316</b> | -                 | -                                  | UA                      | +   | Huang, unpublished                                                                                                                      |
| <b>lpg1328</b> | <i>legT</i>       | thaumatin domain                   | -                       | +   | de Felipe <i>et al.</i> , 2008                                                                                                          |
| <b>lpg1340</b> | <i>flaA/fliC</i>  | -                                  | ND                      | +   |                                                                                                                                         |
| <b>lpg1355</b> | <i>sidG</i>       | CC                                 | Cre/ <i>loxP</i> , CyaA | -   | Cambronne and Roy,<br>2007; Ninio <i>et al.</i> , 2005;<br>Luo and Isberg, 2004                                                         |
| <b>lpg1368</b> | <i>lgt1</i>       | DxD motif/toxin<br>domain          | ND                      | -   |                                                                                                                                         |
| <b>lpg1377</b> | -                 | -                                  | ND                      | +   |                                                                                                                                         |
| <b>lpg1483</b> | <i>legK1</i>      | ser/thr kinase                     | CyaA, BLA               | +/- | This study, Ge <i>et al.</i> ,<br>2009; de Felipe <i>et al.</i> ,<br>2008; Shin <i>et al.</i> , 2008; de<br>Felipe <i>et al.</i> , 2005 |
| <b>lpg1484</b> | -                 | lpg1483 (LegK1)<br>paralog         | ND                      | +   |                                                                                                                                         |
| <b>lpg1488</b> | <i>legC5</i>      | CC                                 | BLA                     | -   | de Felipe <i>et al.</i> , 2008                                                                                                          |
| <b>lpg1489</b> | -                 | -                                  | UA                      | +   | Huang, unpublished                                                                                                                      |
| <b>lpg1588</b> | <i>legC6</i>      | CC                                 | UA, CyaA,<br>BLA        | +   | Huang, unpublished; de<br>Felipe <i>et al.</i> , 2008; Kubori<br><i>et al.</i> , 2008                                                   |
| <b>lpg1602</b> | <i>legL2</i>      | LRR                                | BLA, UA                 | +   | Huang, unpublished; de<br>Felipe <i>et al.</i> , 2008; de<br>Felipe <i>et al.</i> , 2005                                                |
| <b>lpg1642</b> | <i>sidB</i>       | RTX (repeat in<br>toxin) cytotoxin | Cre/ <i>loxP</i> , CyaA | +   | Cambronne and Roy,<br>2007; Luo and Isberg,<br>2004                                                                                     |
| <b>lpg1660</b> | <i>legL3</i>      | LRR                                | CyaA, BLA               | -   | de Felipe <i>et al.</i> , 2008; de<br>Felipe <i>et al.</i> , 2005                                                                       |
| <b>lpg1663</b> | -                 | -                                  | ND                      | +   |                                                                                                                                         |
| <b>lpg1666</b> | <i>ceg24</i>      | -                                  | ND                      | +   |                                                                                                                                         |
| <b>lpg1701</b> | <i>legC3</i>      | CC                                 | BLA                     | +   | Ninio <i>et al.</i> , 2009; de<br>Felipe <i>et al.</i> , 2008                                                                           |
| <b>lpg1718</b> | <i>legAS4</i>     | AR/ SET                            | BLA                     | +   | de Felipe <i>et al.</i> , 2008;<br>Habyarimana <i>et al.</i> , 2008                                                                     |
| <b>lpg1798</b> | -                 | Rho GAP?                           | ND                      | +   |                                                                                                                                         |
| <b>lpg1836</b> | <i>ceg25</i>      | CC                                 | ND                      | +   |                                                                                                                                         |
| <b>lpg1884</b> | <i>legC2/yJfB</i> | CC                                 | CyaA, BLA               | +   | de Felipe <i>et al.</i> , 2008;<br>Cambronne and Roy,<br>2007; Campodonico <i>et al.</i> ,<br>2005                                      |

|                |                |                        |               |   |                                                                                              |
|----------------|----------------|------------------------|---------------|---|----------------------------------------------------------------------------------------------|
| <b>lpg1890</b> | <i>legLC8</i>  | LRR/CC                 | CyaA, BLA     | + | de Felipe <i>et al.</i> , 2008; Kubori <i>et al.</i> , 2008; de Felipe <i>et al.</i> , 2005  |
| <b>lpg1925</b> | -              | -                      | ND            | - |                                                                                              |
| <b>lpg1930</b> | -              | -                      | ND            | - |                                                                                              |
| <b>lpg1931</b> | <i>ceg26</i>   | AR                     | ND            | + |                                                                                              |
| <b>lpg1948</b> | <i>legLC4</i>  | LRR/CC                 | CyaA, BLA     | + | de Felipe <i>et al.</i> , 2008; de Felipe <i>et al.</i> , 2005                               |
| <b>lpg1950</b> | <i>ralF</i>    | <i>sec7</i>            | CyaA, IF      | + | Nagai <i>et al.</i> , 2005; Nagai <i>et al.</i> , 2002                                       |
| <b>lpg1953</b> | <i>legC4</i>   | CC                     | BLA           | + | de Felipe <i>et al.</i> , 2008                                                               |
| <b>lpg1958</b> | <i>legL5</i>   | LRR                    | CyaA, BLA     | + | de Felipe <i>et al.</i> , 2008; Kubori <i>et al.</i> , 2008; de Felipe <i>et al.</i> , 2005  |
| <b>lpg1959</b> | -              | -                      | ND            | - |                                                                                              |
| <b>lpg1976</b> | <i>legG1</i>   | RCC1 domain            | CyaA, BLA, UA | - | Huang, unpublished; Ninio <i>et al.</i> , 2009; de Felipe <i>et al.</i> , 2008               |
| <b>lpg1978</b> | <i>setA</i>    | glucosyltransferase    | UA, CyaA      | + | Huang, unpublished; Heidtman <i>et al.</i> , 2008                                            |
| <b>lpg2073</b> | -              | -                      | ND            | + |                                                                                              |
| <b>lpg2131</b> | <i>legA6</i>   | AR                     | -             | + | de Felipe <i>et al.</i> , 2008                                                               |
| <b>lpg2137</b> | <i>legK2</i>   | ser/thr kinase         | UA, BLA       | + | Huang, unpublished; de Felipe <i>et al.</i> , 2008; Shin <i>et al.</i> , 2008                |
| <b>lpg2144</b> | <i>legAUI3</i> | AR/ Fbox               | BLA           | + | Al-Khodori <i>et al.</i> , 2008; de Felipe <i>et al.</i> , 2008; Zusman <i>et al.</i> , 2007 |
| <b>lpg2154</b> | -              | lpg0234 (SidE) paralog | ND            | - |                                                                                              |
| <b>lpg2155</b> | <i>sidJ</i>    | -                      | IF, CyaA      | + | Kubori <i>et al.</i> , 2008; Cambronne and Roy, 2007; Liu and Luo, 2007                      |
| <b>lpg2156</b> | <i>sdeB</i>    | lpg0234 (SidE) paralog | ND            | + |                                                                                              |
| <b>lpg2157</b> | <i>sdeA</i>    | lpg0234 (SidE) paralog | CyaA          | - | Bardill <i>et al.</i> , 2005                                                                 |
| <b>lpg2160</b> | -              | lpg2638 paralog        | ND            | + |                                                                                              |
| <b>lpg2176</b> | <i>legS2</i>   | sphingosine 1-P lyase  | BLA           | + | de Felipe <i>et al.</i> , 2008                                                               |
| <b>lpg2206</b> | <i>wipC</i>    | -                      | ND            | + |                                                                                              |
| <b>lpg2207</b> | -              | -                      | ND            | - |                                                                                              |
| <b>lpg2210</b> | -              | -                      | ND            | + |                                                                                              |
| <b>lpg2215</b> | <i>legA2</i>   | AR                     | BLA           | + | de Felipe <i>et al.</i> , 2008                                                               |



|                |                   |                           |                           |   |                                                                                                    |
|----------------|-------------------|---------------------------|---------------------------|---|----------------------------------------------------------------------------------------------------|
| <b>lpg2248</b> | -                 | lpg0227 (Ceg7)<br>paralog | UA, CyaA                  | + | Huang, unpublished;<br>Burstein <i>et al.</i> , 2009                                               |
| <b>lpg2266</b> | -                 | -                         | ND                        | - |                                                                                                    |
| <b>lpg2298</b> | <i>legC7/yIfA</i> | CC                        | CyaA, IF, BLA             | + | de Felipe <i>et al.</i> , 2008;<br>Cambronne and Roy,<br>2007; Campodonico <i>et al.</i> ,<br>2005 |
| <b>lpg2300</b> | <i>legA3</i>      | AR                        | BLA, CyaA                 | + | de Felipe <i>et al.</i> , 2008; Pan<br><i>et al.</i> , 2008                                        |
| <b>lpg2322</b> | <i>legA5</i>      | AR                        | BLA, UA                   | + | Huang, unpublished; de<br>Felipe <i>et al.</i> , 2008                                              |
| <b>lpg2370</b> | -                 | -                         | ND                        | + |                                                                                                    |
| <b>lpg2391</b> | <i>sdbC</i>       | lpg1642 (SidB)<br>paralog | ND                        | + |                                                                                                    |
| <b>lpg2392</b> | <i>legL6</i>      | LRR                       | UA                        | + | Huang, unpublished; de<br>Felipe <i>et al.</i> , 2008                                              |
| <b>lpg2395</b> | -                 | Cdc2 similarity           | ND                        | - |                                                                                                    |
| <b>lpg2400</b> | <i>legL7</i>      | LRR                       | CyaA, BLA                 | + | de Felipe <i>et al.</i> , 2008; de<br>Felipe <i>et al.</i> , 2005                                  |
| <b>lpg2409</b> | <i>ceg29</i>      | -                         | CyaA                      | + | Zusman <i>et al.</i> , 2007                                                                        |
| <b>lpg2410</b> | <i>vpdA</i>       | phospholipase             | UA, IF                    | - | VanRheenen <i>et al.</i> , 2006                                                                    |
| <b>lpg2416</b> | <i>legA1</i>      | AR                        | -                         | + | de Felipe <i>et al.</i> , 2008                                                                     |
| <b>lpg2420</b> | -                 | lpg2247 paralog           | ND                        | + |                                                                                                    |
| <b>lpg2425</b> | -                 | -                         | UA                        | + | Huang, unpublished                                                                                 |
| <b>lpg2433</b> | <i>ceg30</i>      | -                         | CyaA                      | - | Burstein <i>et al.</i> , 2009                                                                      |
| <b>lpg2452</b> | <i>legA14</i>     | AR                        | BLA, CyaA                 | + | de Felipe <i>et al.</i> , 2008                                                                     |
| <b>lpg2455</b> | -                 | -                         | ND                        | + |                                                                                                    |
| <b>lpg2456</b> | <i>legA15</i>     | AR                        | BLA, CyaA                 | + | de Felipe <i>et al.</i> , 2008                                                                     |
| <b>lpg2461</b> | -                 | -                         | ND                        | - |                                                                                                    |
| <b>lpg2464</b> | <i>sidM/drrA</i>  | Rab1 GEF/ GDF             | IF, CyaA                  | + | Ingmundson <i>et al.</i> , 2007;<br>Machner and Isberg,<br>2006; Murata <i>et al.</i> , 2006       |
| <b>lpg2465</b> | <i>sidD</i>       | -                         | Cre/loxP, CyaA            | + | Luo and Isberg, 2004                                                                               |
| <b>lpg2482</b> | <i>sdbB</i>       | Lipase                    | ND                        | + |                                                                                                    |
| <b>lpg2504</b> | <i>ceg32</i>      | -                         | Cre/loxP, UA,<br>CyaA, IF | - | Huang, unpublished;<br>Burstein <i>et al.</i> , 2009; Shen<br><i>et al.</i> , 2009                 |
| <b>lpg2508</b> | <i>sdjA</i>       | lpg2155 (SidJ)<br>paralog | IF, CyaA                  | + | Kubori <i>et al.</i> , 2008; Liu<br>and Luo, 2007                                                  |
| <b>lpg2509</b> | <i>sdeD</i>       | lpg0234 (SidE)<br>paralog | ND                        | + |                                                                                                    |

|                |                   |                             |                             |   |                                                                                                        |
|----------------|-------------------|-----------------------------|-----------------------------|---|--------------------------------------------------------------------------------------------------------|
| <b>lpg2510</b> | <i>sdcA</i>       | lpg2511 (SidC) paralog, CC  | ND                          | + |                                                                                                        |
| <b>lpg2511</b> | <i>sidC</i>       | CC                          | Cre/ <i>loxP</i> , IF, CyaA | + | Ragaz <i>et al.</i> , 2008; Cambronne and Roy, 2007; Luo and Isberg, 2004                              |
| <b>lpg2523</b> | -                 | -                           | CyaA                        | + | Burstein <i>et al.</i> , 2009                                                                          |
| <b>lpg2525</b> | -                 | F-box?                      | UA                          | - | Huang, unpublished                                                                                     |
| <b>lpg2527</b> | <i>lnaB</i>       | CC, lpg0437 (Ceg14) paralog | CyaA                        | + | This Study, Kubori <i>et al.</i> , 2008                                                                |
| <b>lpg2552</b> | -                 | -                           | ND                          | + |                                                                                                        |
| <b>lpg2556</b> | <i>legK3</i>      | ser/thr kinase              | BLA                         | + | de Felipe <i>et al.</i> , 2008; Shin <i>et al.</i> , 2008                                              |
| <b>lpg2586</b> | -                 | -                           | ND                          | + |                                                                                                        |
| <b>lpg2591</b> | <i>ceg33</i>      | -                           | CyaA                        | + | Altman and Segal, 2008                                                                                 |
| <b>lpg2603</b> | <i>sdmB</i>       | lpg2464 (SidM) paralog      | UA, CyaA                    | + | Huang, unpublished; Burstein <i>et al.</i> , 2009                                                      |
| <b>lpg2638</b> | -                 | lpg2160 paralog             | ND                          | + |                                                                                                        |
| <b>lpg2678</b> | -                 | lpg0563 paralog             | ND                          | + |                                                                                                        |
| <b>lpg2694</b> | <i>legD1</i>      | -                           | -                           | - | de Felipe <i>et al.</i> , 2008                                                                         |
| <b>lpg2718</b> | <i>wipA</i>       | -                           | CyaA                        | + | Ninio <i>et al.</i> , 2005                                                                             |
| <b>lpg2720</b> | <i>legN</i>       | cNMP binding domain         | -                           | + | de Felipe <i>et al.</i> , 2008                                                                         |
| <b>lpg2806</b> | -                 | -                           | ND                          | - |                                                                                                        |
| <b>lpg2813</b> | <i>vipE</i>       | -                           | ND                          | + |                                                                                                        |
| <b>lpg2815</b> | <i>dimB</i>       | -                           | UA                          | - | Huang, unpublished                                                                                     |
| <b>lpg2826</b> | <i>ceg34</i>      | AR                          | CyaA                        | - | Burstein <i>et al.</i> , 2009                                                                          |
| <b>lpg2829</b> | <i>sidH</i>       | -                           | Cre/ <i>loxP</i> , UA, CyaA | - | Cambronne and Roy, 2007; Laguna <i>et al.</i> , 2006; Ninio <i>et al.</i> , 2005; Luo and Isberg, 2004 |
| <b>lpg2830</b> | <i>legU2/lubX</i> | U-box                       | CyaA, BLA                   | + | de Felipe <i>et al.</i> , 2008; Kubori <i>et al.</i> , 2008                                            |
| <b>lpg2831</b> | <i>vipD</i>       | phospholipase               | CyaA, UA                    | + | VanRheenen <i>et al.</i> , 2006; Shohdy <i>et al.</i> , 2005                                           |
| <b>lpg2862</b> | <i>legC8</i>      | CC                          | BLA                         | - | de Felipe <i>et al.</i> , 2008                                                                         |
| <b>lpg2874</b> | -                 | -                           | ND                          | + |                                                                                                        |
| <b>lpg2884</b> | -                 | -                           | UA                          | + | Huang, unpublished                                                                                     |
| <b>lpg2907</b> | -                 | -                           | ND                          | - |                                                                                                        |
| <b>lpg2952</b> | <i>ceg35</i>      | -                           | ND                          | - |                                                                                                        |
| <b>lpg2975</b> | -                 | -                           | UA                          | - | Huang, unpublished                                                                                     |
| <b>lpg2999</b> | <i>legP</i>       | astacin protease            | BLA                         | + | de Felipe <i>et al.</i> , 2008                                                                         |

Lpg#, *Legionella pneumophila* Philadelphia gene annotation. <sup>a</sup>Domain, AR, ankryin repeat; LRR, leucine rich repeats; CC, coiled-coil. <sup>b</sup>Translocation, assay used to demonstrate whether protein is an Icm/Dot secretion system substrate. IF, immunofluorescence; UA, unpublished fusion assay (Huang and Isberg, data not shown). CyaA fusion, adenylate cyclase reporter assay. BLA,  $\beta$ -lactamase fusion assay. Cre/*loxP*, interbacterial transfer assay. <sup>c</sup>Protein expression in 293T, + or -, indicates detection of the full-length GFP-fusions by Western blot.

### Table S1 References:

- Al-Khodor, S., Price, C.T., Habyarimana, F., Kalia, A. and Abu Kwaik, Y. (2008) A Dot/Icm-translocated ankyrin protein of *Legionella pneumophila* is required for intracellular proliferation within human macrophages and protozoa. *Mol Microbiol.* **70**: 908-923.
- Altman, E. and Segal, G. (2008) The response regulator CpxR directly regulates expression of several *Legionella pneumophila* icm/dot components as well as new translocated substrates. *J Bacteriol.* **190**: 1985-1996.
- Bardill, J.P., Miller, J.L. and Vogel, J.P. (2005) IcmS-dependent translocation of SdeA into macrophages by the *Legionella pneumophila* type IV secretion system. *Mol Microbiol.* **56**: 90-103.
- Burstein, D., Zusman, T., Degtyar, E., Viner, R., Segal, G. and Pupko, T. (2009) Genome-scale identification of *Legionella pneumophila* effectors using a machine learning approach. *PLoS Pathog.* **5**: e1000508.
- Cambronne, E.D. and Roy, C.R. (2007) The *Legionella pneumophila* IcmSW Complex Interacts with Multiple Dot/Icm Effectors to Facilitate Type IV Translocation. *PLoS Pathog.* **3**: e188.

- Campodonico, E.M., Chesnel, L. and Roy, C.R. (2005) A yeast genetic system for the identification and characterization of substrate proteins transferred into host cells by the *Legionella pneumophila* Dot/Icm system. *Mol Microbiol.* **56**: 918-933.
- Conover, G.M., Derre, I., Vogel, J.P. and Isberg, R.R. (2003) The *Legionella pneumophila* LidA protein: a translocated substrate of the Dot/Icm system associated with maintenance of bacterial integrity. *Mol Microbiol.* **48**: 305-321.
- de Felipe, K.S., Pampou, S., Jovanovic, O.S., Pericone, C.D., Ye, S.F., Kalachikov, S. and Shuman, H.A. (2005) Evidence for acquisition of *Legionella* type IV secretion substrates via interdomain horizontal gene transfer. *J Bacteriol.* **187**: 7716-7726.
- de Felipe, K.S., Glover, R.T., Charpentier, X., Anderson, O.R., Reyes, M., Pericone, C.D. and Shuman, H.A. (2008) *Legionella* eukaryotic-like type IV substrates interfere with organelle trafficking. *PLoS Pathog.* **4**: e1000117.
- Derre, I. and Isberg, R.R. (2005) LidA, a translocated substrate of the *Legionella pneumophila* type IV secretion system, interferes with the early secretory pathway. *Infect Immun.* **73**: 4370-4380.
- Ge, J., Xu, H., Li, T., Zhou, Y., Zhang, Z., Li, S., *et al* (2009) A *Legionella* type IV effector activates the NF- $\kappa$ B pathway by phosphorylating the I $\kappa$ B family of inhibitors. *Proc Natl Acad Sci U S A.*
- Habyarimana, F., Al-Khodori, S., Kalia, A., Graham, J.E., Price, C.T., Garcia, M.T. and Kwaik, Y.A. (2008) Role for the Ankyrin eukaryotic-like genes of *Legionella pneumophila* in parasitism of protozoan hosts and human macrophages. *Environ Microbiol.* **10**: 1460-1474.
- Heidtman, M., Chen, E.J., Moy, M.Y. and Isberg, R.R. (2009) Large-scale identification of *Legionella pneumophila* Dot/Icm substrates that modulate host cell vesicle trafficking pathways. *Cell Microbiol.* **11**: 230-248.
- Huang, L.C., T. O'Conner, T., Isberg R.R. (unpublished).

- Ingmundson, A., Delprato, A., Lambright, D.G. and Roy, C.R. (2007) *Legionella pneumophila* proteins that regulate Rab1 membrane cycling. *Nature*. **450**: 365-369.
- Kubori, T., Hyakutake, A. and Nagai, H. (2008) *Legionella* translocates an E3 ubiquitin ligase that has multiple U-boxes with distinct functions. *Mol Microbiol*. **67**: 1307-1319.
- Laguna, R.K., Creasey, E.A., Li, Z., Valtz, N. and Isberg, R.R. (2006) A *Legionella pneumophila*-translocated substrate that is required for growth within macrophages and protection from host cell death. *Proc Natl Acad Sci U S A*. **103**: 18745-18750.
- Liu, Y. and Luo, Z.Q. (2007) The *Legionella pneumophila* effector SidJ is required for efficient recruitment of endoplasmic reticulum proteins to the bacterial phagosome. *Infect Immun*. **75**: 592-603.
- Luo, Z.Q. and Isberg, R.R. (2004) Multiple substrates of the *Legionella pneumophila* Dot/Icm system identified by interbacterial protein transfer. *Proc Natl Acad Sci U S A*. **101**: 841-846.
- Machner, M.P. and Isberg, R.R. (2006) Targeting of host Rab GTPase function by the intravacuolar pathogen *Legionella pneumophila*. *Dev Cell*. **11**: 47-56.
- Murata, T., Delprato, A., Ingmundson, A., Toomre, D.K., Lambright, D.G. and Roy, C.R. (2006) The *Legionella pneumophila* effector protein DrrA is a Rab1 guanine nucleotide-exchange factor. *Nat Cell Biol*. **8**: 971-977.
- Nagai, H., Kagan, J.C., Zhu, X., Kahn, R.A. and Roy, C.R. (2002) A bacterial guanine nucleotide exchange factor activates ARF on *Legionella* phagosomes. *Science*. **295**: 679-682.
- Nagai, H., Cambronne, E.D., Kagan, J.C., Amor, J.C., Kahn, R.A. and Roy, C.R. (2005) A C-terminal translocation signal required for Dot/Icm-dependent delivery of the *Legionella* RalF protein to host cells. *Proc Natl Acad Sci U S A*. **102**: 826-831.
- Ninio, S., Celli, J. and Roy, C.R. (2009) A *Legionella pneumophila* effector protein encoded in a region of genomic plasticity binds to Dot/Icm-modified vacuoles. *PLoS Pathog*. **5**: e1000278.

- Ninio, S., Zuckman-Cholon, D.M., Cambronne, E.D. and Roy, C.R. (2005) The *Legionella* IcmS-IcmW protein complex is important for Dot/Icm-mediated protein translocation. *Mol Microbiol.* **55**: 912-926.
- Pan, X., Luhrmann, A., Satoh, A., Laskowski-Arce, M.A. and Roy, C.R. (2008) Ankyrin repeat proteins comprise a diverse family of bacterial type IV effectors. *Science.* **320**: 1651-1654.
- Ragaz, C., Pietsch, H., Urwyler, S., Tiaden, A., Weber, S.S. and Hilbi, H. (2008) The *Legionella pneumophila* phosphatidylinositol-4 phosphate-binding type IV substrate SidC recruits endoplasmic reticulum vesicles to a replication-permissive vacuole. *Cell Microbiol.* **10**: 2416-2433.
- Shen, X., Banga, S., Liu, Y., Xu, L., Gao, P., Shamovsky, I., *et al* (2009) Targeting eEF1A by a *Legionella pneumophila* effector leads to inhibition of protein synthesis and induction of host stress response. *Cell Microbiol.* **11**: 911-926.
- Shin, S., Case, C.L., Archer, K.A., Nogueira, C.V., Kobayashi, K.S., Flavell, R.A., *et al* (2008) Type IV Secretion-Dependent Activation of Host MAP Kinases Induces an Increased Proinflammatory Cytokine Response to *Legionella pneumophila*. *PLoS Pathog.* **4**: e1000220.
- Shohdy, N., Efe, J.A., Emr, S.D. and Shuman, H.A. (2005) Pathogen effector protein screening in yeast identifies *Legionella* factors that interfere with membrane trafficking. *Proc Natl Acad Sci U S A.* **102**: 4866-4871.
- VanRheenen, S.M., Luo, Z.Q., O'Connor, T. and Isberg, R.R. (2006) Members of a *Legionella pneumophila* family of proteins with ExoU (phospholipase A) active sites are translocated to target cells. *Infect Immun.* **74**: 3597-3606.
- Zusman, T., Aloni, G., Halperin, E., Kotzer, H., Degtyar, E., Feldman, M. and Segal, G. (2007) The response regulator PmrA is a major regulator of the icm/dot type IV secretion system in *Legionella pneumophila* and *Coxiella burnetii*. *Mol Microbiol.* **63**: 1508-1523.

**Table S2. Primers used in this study**

| Primer Name | Restriction site | Sequence                                                                                |
|-------------|------------------|-----------------------------------------------------------------------------------------|
| Nod1F-myc   | EcoRI            | CCGGAATT <b>CGGG</b> AAGAGCAGGGCCACAGT                                                  |
| Nod1R       | XhoI             | CCG <b>CTCGAG</b> CGAGTGGCATTGCTGCTGA                                                   |
| siEGFPF     | BamHI/HindIII    | <b>GATCC</b> CGTGA <b>ACTT</b> CAGGGTCAGCTTGCTTGATATCCGGCAAGCTGACCCTGAAGTTCATTTTTTCCAAA |
| siEGFPR     | BamHI/HindIII    | <b>AGCTT</b> TTGGAAAAAATGA <b>ACTT</b> CAGGGTCAGCTTGCCGGATATCAAGCAAGCTGACCCTGAAGTTCACGG |
| siNod1F1    | BamHI/HindIII    | <b>GATCC</b> CGTCAAAGGCAGCACGGAAGTGCTTGATATCCGGCACTTCCGTGCTGCCTTTGATTTTTTCCAAA          |
| siNod1R1    | BamHI/HindIII    | <b>AGCTT</b> TTGGAAAAAAGGATGAAGATGGTCTCACCTCGGATATCAAAGGGTGAGACCATCTTCATCCGG            |
| siNod1F2    | BamHI/HindIII    | <b>GATCC</b> CAGTCATTCTTCAGCAAGTTGTTGATATCCGACA <b>ACTT</b> GCTGAAGAATGACTTTTTTCCAAA    |
| siNod1R2    | BamHI/HindIII    | <b>AGCTT</b> TTGGAAAAAAGTCATTCTTCAGCAAGTTGTCGGATATCAAACA <b>ACTT</b> GCTGAAGAATGACTGG   |
| 1483F-cyaA  | BamHI            | GCGGATCCATGCCTCGTACCATGTTTTT                                                            |
| 2527F-cyaA  | BamHI            | GCGGATCCCTTGTTATATTTTGTACTATGTG                                                         |
| 1950F-cyaA  | BamHI            | GCGGATCCATGCATCCAGAAATTGAAAAAGC                                                         |
| 1950R       | SaII             | ACGCGT <b>CGACTT</b> AAAATTTTAATTGTCTACCTT                                              |
| 2527F1-KO   | BamHI            | ACGGGATCCCCCATAAAGAGCAAACAACACA                                                         |
| 2527R1-KO   | SaII             | ACGCGT <b>CGAC</b> GCGCTGACAGCCAGTTTTTCGC                                               |
| 2527F2-KO   | SacI             | ATCGAGCTCGTCATAATGAATGATATCAATG                                                         |
| 2527R2-KO   | BamHI            | ACGGGATCCGTTTCTGCGGTGCTTGATGTA                                                          |
| 1483F1-KO   | SacI             | CAGTACGAGCTCACATCAGCTCTTTACCTAATACG                                                     |
| 1483R1-KO   | BamHI            | CGGGATCCGGGTACGAGGCATGATA                                                               |
| 1483F2-KO   | BamHI            | CGGGATCCCTGTATTTCCCGGATTAT                                                              |
| 1483R2-KO   | SaII             | CAGCTAGT <b>CGACTT</b> GATAAGCAACTCTGCTTTCAG                                            |
| 2527F EGFP  | EcoRI            | TCGAATTCTTTGTTATATTTTGTACTATGTG                                                         |
| 2527R2      | BamHI            | GAGGATCCCTCATGATGCATCGCTGATTG                                                           |
| 2527R3      | BamHI            | GAGGATCCATTTCAGTGCCTCGCGATGGCG                                                          |
| 2527F3      | EcoRI            | TCGAATTCTGAGTTACAAGAGCGATTAAAG                                                          |
| 2527F4      | BamHI            | CTGGATCCAATAAATTAACGAGGTATTT                                                            |
| 2527R4      | BamHI            | CTGGATCCCTATTGTAAACGAGCGCTTTTG                                                          |

In bold are the restriction enzyme sites.

**Table S3. Plasmids used in this study**

| Name                          | Relevant Genotype                             | Primers used                                   | Reference or Source                  |
|-------------------------------|-----------------------------------------------|------------------------------------------------|--------------------------------------|
| pSR47s                        | ori R6K ori TRP4 Kan <sup>R</sup> <i>sacB</i> |                                                | (Merriam et al., 1997)               |
| pJB-CyaA                      | pJB2581 CM <sup>R</sup> , Amp <sup>R</sup>    |                                                | (Bardill et al., 2005)               |
| pEGFP-C1                      | KAN <sup>R</sup>                              |                                                | Clontech                             |
| pRNAT.U6.1                    | Amp <sup>R</sup>                              |                                                | Genescript                           |
| pNFκB-luciferase              | Amp <sup>R</sup>                              |                                                | Stratagene                           |
| pMyc                          | Amp <sup>R</sup>                              |                                                | Clontech                             |
| pMyc-Nod1                     | pMyc +Human Nod1                              | Nod1F-myc/Nod1R                                | This study                           |
| psiEGFP                       | pRNAT.U6.1-siEGFP                             | siEGFPF/siEGRPR                                | This study                           |
| psiNod1                       | pRNAT.U6.1-siNod1                             | siNod1F/siNod1R                                | This study                           |
| pJB-CyaA-RalF                 | pJB2581+RalF (lpg1950)                        | 1950F-cyaA/1950R                               | This study<br>(Bardill et al., 2005) |
| pJB-CyaA-LegK1                | pJB2581+LegK1 (lpg1483)                       | 1483F-cyaA/1483R                               | This study                           |
| pJB-CyaA-LnaB                 | pJB2581+LnaB (lpg2527)                        | 2527F-cyaA/2527R                               | This study                           |
| pSR47s- <i>ΔlegK1</i>         | <i>legK1</i> flanking regions                 | 1483F1-KO/1483R1-KO<br>and 1483F2-KO/1483R2-KO | This study                           |
| pSR47s- <i>ΔlnaB</i>          | <i>lnaB</i> flanking regions                  | 2527F1-KO/2527R1-KO<br>and 2527F2-KO/2527R2-KO | This study                           |
| pSR47s-LnaB                   | pSR47s +LnaB (lpg2527)                        | 2527F1-KO/2527R2-KO                            | This study                           |
| pEGFP-LnaB                    | pEGFP + LnaB (lpg2527)                        | 2527F-EGFP/2527R4                              | This study                           |
| pEGFP-LnaB <sub>1-361</sub>   |                                               | 2527F-EGFP/2527R2                              | This study                           |
| pEGFP-LnaB <sub>1-401</sub>   |                                               | 2527F-EGFP/2527R3                              | This study                           |
| pEGFP-LnaB <sub>361-401</sub> |                                               | 2527F3/2527R3                                  | This study                           |
| pEGFP-LnaB <sub>361-558</sub> |                                               | 2527F3/2527R4                                  | This study                           |
| pEGFP-LnaB <sub>401-558</sub> |                                               | 2527F4/2527R4                                  | This study                           |
| pEGFP-LnaBΔCC                 |                                               | 2527F-EGFP/2527R2<br>and 2527F4/2527R4         | This study                           |
| <b>Gateway® Plasmids</b>      |                                               |                                                |                                      |
| pDEST17                       | pDEST17 (His) Amp <sup>R</sup>                |                                                | Invitrogen                           |
| pDEST53                       | pDEST53 (GFP) Amp <sup>R</sup>                |                                                | Invitrogen                           |
| pDONR221                      | pDONR221 KAN <sup>R</sup>                     |                                                | Invitrogen                           |



**Table S4. Bacterial strains used in this study**

| Name                                 | Strain                                                  | Relevant genotype                               | Reference or source           |
|--------------------------------------|---------------------------------------------------------|-------------------------------------------------|-------------------------------|
| <b><i>E. coli</i> strains</b>        |                                                         |                                                 |                               |
|                                      | DH5 $\alpha$ $\lambda$ pir                              | DH5 $\alpha$ ( $\lambda$ pir)<br><i>tet::Mu</i> | (Kolter et al., 1978)         |
|                                      | DH5 $\alpha$                                            |                                                 |                               |
|                                      | Helper <i>E. coli</i>                                   | MT607 pRK600                                    | (Finan et al., 1986)          |
| <b><i>L. pneumophila</i> strains</b> |                                                         |                                                 |                               |
|                                      | Lp02 or wild-type                                       | Lp01 <i>rpsL hsdR thyA</i>                      | (Berger and Isberg, 1993)     |
|                                      | <i>dotA</i>                                             | Lp02 <i>dotA3</i>                               | (Berger and Isberg, 1993)     |
|                                      | Lp02 $\Delta$ <i>flaA</i>                               | Lp02 $\Delta$ <i>flaA</i>                       | (Ren et al., 2006)            |
|                                      | <i>dotA</i> $\Delta$ <i>fla</i>                         | Lp02 <i>dotA3</i> $\Delta$ <i>flaA</i>          | Creasey, E (Ren et al., 2006) |
| VPL1                                 | $\Delta$ <i>legK1</i>                                   | Lp02 $\Delta$ <i>legK1</i>                      | This study                    |
| VPL2                                 | $\Delta$ <i>lnaB</i>                                    | Lp02 $\Delta$ <i>lnaB</i>                       | This study                    |
| VPL3                                 | Lp02 pJB-cyaA                                           |                                                 | This study                    |
| VPL4                                 | Lp03 pJB-cyaA                                           |                                                 | This study                    |
| VPL5                                 | Lp02 pJB-cyaA-RalF                                      |                                                 | This study                    |
| VPL6                                 | Lp03 pJB-cyaA-RalF                                      |                                                 | This study                    |
| VPL7                                 | Lp02 pJB-cyaA-LegK1                                     |                                                 | This study                    |
| VPL8                                 | Lp03 pJB-cyaA-LegK1                                     |                                                 | This study                    |
| VPL9                                 | Lp02 pJB-cyaA-LnaB                                      |                                                 | This study                    |
| VPL10                                | Lp03 pJB-cyaA-LnaB                                      |                                                 | This study                    |
| VPL11                                | Lp02:: <i>SR47s</i>                                     |                                                 | This study                    |
| VPL12                                | $\Delta$ <i>lnaB</i> :: <i>SR47s</i>                    | Lp02 $\Delta$ <i>lnaB</i>                       | This study                    |
| VPL13                                | $\Delta$ <i>lnaB</i> :: <i>SR47s</i> -LnaB <sup>+</sup> |                                                 | This study                    |
